# Supplementary material
Source: MDPI journal article supplement (https://www.mdpi.com/2073-4344/13/3/616)
Supplement: s1 [file s1]

# Effect of Urea as a Shape-Controlling Agent on the Properties of Bismuth Oxybromides

Viktória Márta <sup>1,†</sup>, Zsolt Pap <sup>1,2,3,†</sup>, Enikő Bárdos <sup>1</sup>, Tamás Gyulavári <sup>1</sup>, Gábor Veréb <sup>4,\*</sup> and Klara Hernadi <sup>5,\*</sup>

<sup>1</sup> Department of Applied and Environmental Chemistry, University of Szeged, Rerrich Béla Sqr. 1, H-6720 Szeged, Hungary

<sup>2</sup> Centre of Nanostructured Materials and Bio-Nano-Interfaces, Institute for Interdisciplinary Research on Bio-Nano-Sciences, Babes-Bolyai University, Treboniu Laurian 42, RO-400271 Cluj-Napoca, Romania

<sup>3</sup> Laboratory for Advanced Materials and Applied Technologies, Institute for Research, Development and Innovation in Applied Natural Sciences, Babes-Bolyai University, Fântânele Str. 30, RO-400294 Cluj-Napoca, Romania

<sup>4</sup> Department of Biosystems Engineering, Faculty of Engineering, University of Szeged, Moszkvai Blvd. 9, H-6725 Szeged, Hungary

<sup>5</sup> Institute of Physical Metallurgy, Metal Forming and Nanotechnology, Faculty of Materials and Chemical Engineering, University of Miskolc, Miskolc-Egyetemváros, C/2-5, H-3515 Miskolc, Hungary

\* Correspondence: verebg@mk.u-szeged.hu (G.V.); klara.hernadi@uni-miskolc.hu (K.H.); Tel.: +36-62-546-582 (G.V.); +36-46-565-111 (ext. 1339) (K.H.)

† These authors contributed equally to this work.

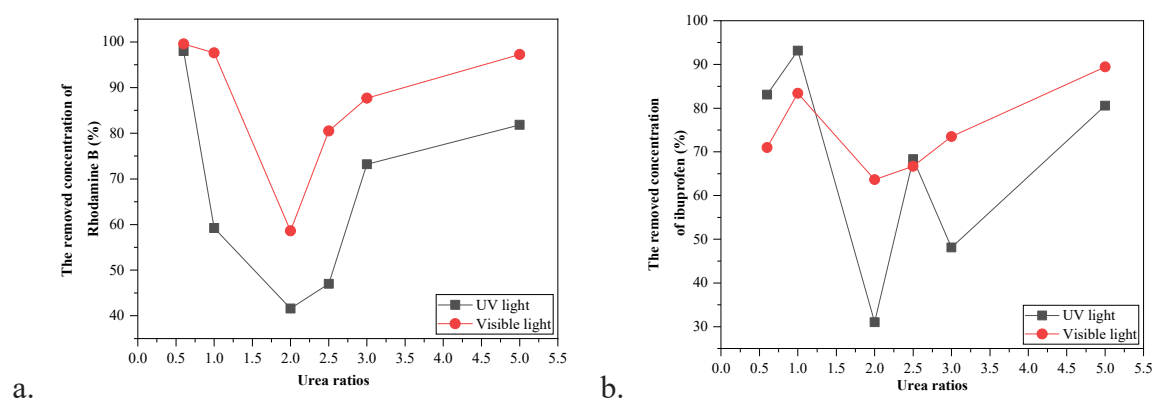

**Figure S1.** Correlation between the urea ratio of the synthesis mixture and the efficiency of the photocatalysts for (a) rhodamine B and (b) ibuprofen degradation under UV and visible light.

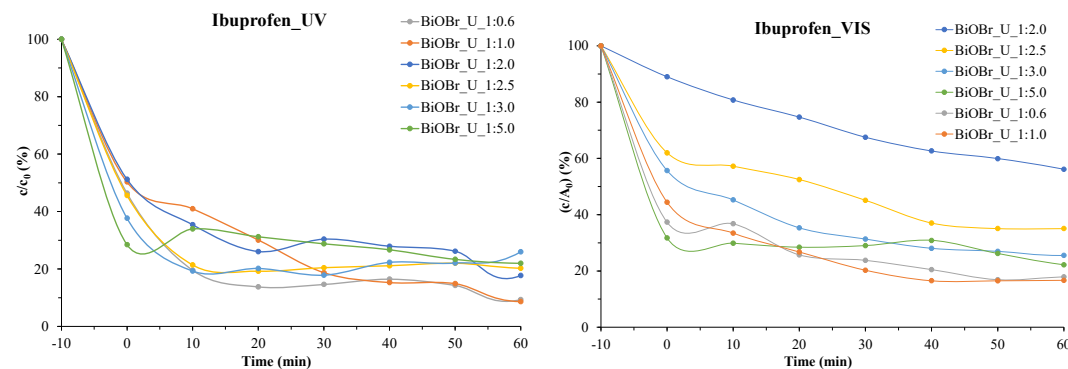

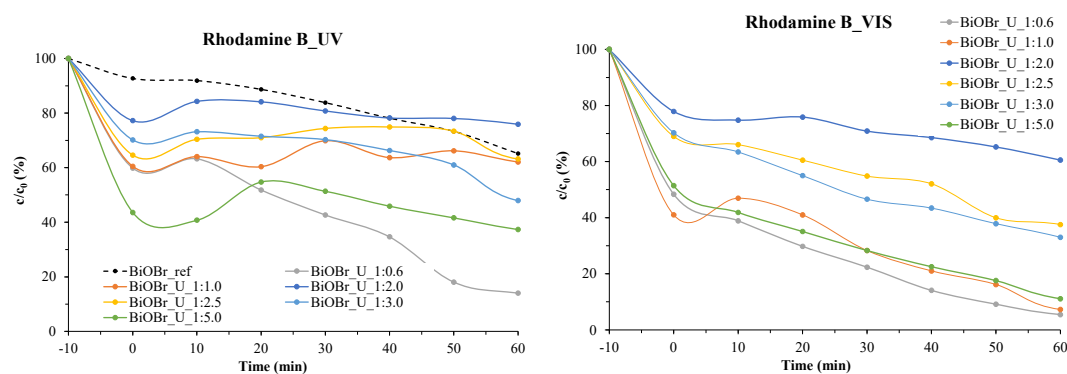

**Figure S2.** Degradation curves obtained during the photocatalytic oxidation of rhodamine B and ibuprofen by urea-modified BiOBr photocatalysts under UV and visible light irradiation.

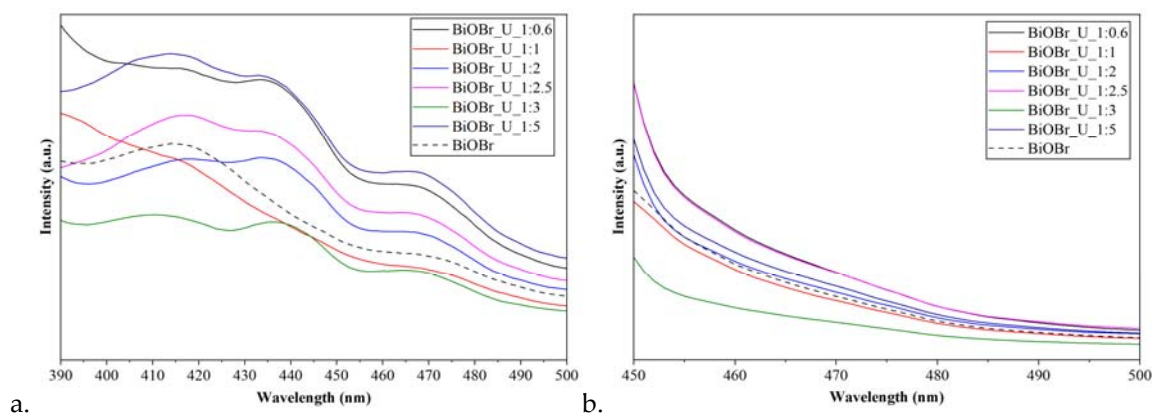

**Figure S3.** Photoluminescence spectra of various BiOBr samples under (a) UV (365 nm) and (b) visible light excitation (435 nm).
